# Supplementary material
Source: Research Square preprint supplement (doi:10.21203/rs.3.rs-9594808/v1)
Supplement: Supplementary file 1 [file ac62dcb9b6af1c63ee88920e.docx]

| **No.** | **Country of Origin** | **Total** |
| --- | --- | --- |
| supplement | supplement | supplement |
| 2 | Myanmar | 216 |
| 3 | Somalia | 164 |
| 4 | Sudan | 65 |
| 5 | Iran | 66 |
| 6 | Pakistan | 42 |
| 7 | Iraq | 66 |
| 8 | Sri Lanka | 42 |
| 9 | Ethiopia | 28 |
| 10 | Palestine | 12 |
| 11 | Yemen | 2 |
| 12 | Egypt | 1 |
| Total |  | 1,832 |

*Table 1. Immigrant Population by Country of Origin in Makassar (IOM, 2022)*

### 5.1.2 Gender Distribution

Of the 121 total participants, 68 were male (56.2%) and 53 were female (43.8%), indicating a slight male majority in the study sample.

| **Gender** | **Frequency** | **Percent (%)** |
| --- | --- | --- |
| Male | 68 | 56.2 |
| Female | 53 | 43.8 |
| Total | 121 | 100.0 |

*Table 3. Distribution of Respondents by Gender*

| **Tooth Case / Procedure** | **Frequency** | **Percent (%)** |
| --- | --- | --- |
| Regular dental check-up | 13 | 10.7 |
| Scaling | 22 | 18.2 |
| Crown and bridge | 18 | 14.9 |
| Filling (composite or amalgam) | 10 | 8.3 |
| Dental implant | 7 | 5.8 |
| Root canal treatment | 17 | 14.0 |
| Tooth extraction | 17 | 14.0 |
| Denture (partial or complete) | 8 | 6.6 |
| Bone graft | 4 | 3.3 |
| Periodontal flap | 3 | 2.5 |
| Orthodontic | 2 | 1.7 |
| Total | 121 | 100.0 |

*Table 4. Distribution of Respondents by Type of Dental Case*

| **Age Group (years)** | **Frequency** | **Percent (%)** |
| --- | --- | --- |
| 20–25 | 20 | 16.5 |
| 26–30 | 23 | 19.0 |
| 31–35 | 32 | 26.4 |
| 36–40 | 29 | 24.0 |
| 41 and above | 17 | 14.0 |
| Total | 121 | 100.0 |

*Table 5. Distribution of Respondents by Age Group*

| **Test** | **Result** | **Interpretation** |
| --- | --- | --- |
| Validity (Sig. 2-tailed) | p = 0.000 (all items) | All items valid |
| Reliability (Cronbach's Alpha) | 0.885 (31 items) | High reliability |

*Table 6. Summary of Validity and Reliability Test Results*

| **Variable** | **n** | **Mean** | **Std. Deviation** |
| --- | --- | --- | --- |
| Tangibles (X1) | 121 | 20.13 | 2.31 |
| Responsiveness (X2) | 121 | 15.36 | 2.00 |
| Reliability (X3) | 121 | 18.96 | 2.62 |
| Assurance (X4) | 121 | 19.02 | 2.71 |
| Empathy (X5) | 121 | 15.07 | 2.45 |
| Quality of Dental Health Services (Z) | 121 | 12.74 | 1.54 |
| Migrant's Satisfaction (Y) | 121 | 20.23 | 2.34 |

*Table 7. Descriptive Statistics for All Variables*

| **Test** | **Statistic** | **p-value** | **Interpretation** |
| --- | --- | --- | --- |
| Kolmogorov-Smirnov (Normality) | 0.089 | 0.119 | Normal distribution confirmed |

*Table 8. Normality Test Results (Kolmogorov-Smirnov)*

|  | **Sum of Squares** | **df** | **Mean Square** | **F** | **Sig.** |
| --- | --- | --- | --- | --- | --- |
| Regression | 387.853 | 6 | 64.642 | 27.126 | 0.000 |
| Residual | 271.668 | 114 | 2.383 |  |  |
| Total | 659.521 | 120 |  |  |  |

*Table 9. ANOVA F-Test Results*

| **Variable** | **B** | **Std. Error** | **Beta (β)** | **t** | **Sig.** |
| --- | --- | --- | --- | --- | --- |
| Constant | 2.431 | 1.713 |  | 1.418 | 0.016 |
| Tangibles (X1) | 0.512 | 0.084 | 0.135 | 6.107 | 0.000 |
| Responsiveness (X2) | 0.336 | 0.139 | 0.106 | 2.424 | 0.017 |
| Reliability (X3) | 0.113 | 0.097 | 0.115 | 1.137 | 0.040 |
| Assurance (X4) | 0.170 | 0.088 | 0.197 | 1.940 | 0.049 |
| Empathy (X5) | 0.198 | 0.078 | 0.126 | 2.548 | 0.012 |
| Quality of DHS (Z) | 0.143 | 0.293 | 0.494 | 1.541 | 0.026 |

*Table 10. Regression Coefficients – Model 1 (Dependent Variable: Migrant Satisfaction)*

| **Variable** | **B** | **Std. Error** | **Beta (β)** | **t** | **Sig.** |
| --- | --- | --- | --- | --- | --- |
| Constant | 11.195 | 1.371 |  | 8.166 | 0.000 |
| Tangibles (X1) | 0.197 | 0.296 | 0.346 | 1.013 | 0.013 |
| Responsiveness (X2) | 0.169 | 0.142 | 0.390 | 1.488 | 0.026 |
| Reliability (X3) | 0.173 | 0.296 | 0.425 | 1.762 | 0.048 |
| Assurance (X4) | 0.150 | 0.289 | 0.489 | 1.567 | 0.018 |
| Empathy (X5) | 0.127 | 0.279 | 0.350 | 1.612 | 0.010 |

*Table 11. Regression Coefficients – Model 2 (Dependent Variable: Quality of Dental Health Services)*

| **Variable** | **Direct Effect (→Y)** | **Indirect Effect (via Z)** | **Total Effect** |
| --- | --- | --- | --- |
| Tangibles (X1) | 0.135 | 0.346 × 0.494 = 0.171 | 0.306 |
| Responsiveness (X2) | 0.106 | 0.390 × 0.494 = 0.193 | 0.299 |
| Reliability (X3) | 0.115 | 0.425 × 0.494 = 0.210 | 0.325 |
| Assurance (X4) | 0.197 | 0.489 × 0.494 = 0.242 | 0.439 |
| Empathy (X5) | 0.126 | 0.350 × 0.494 = 0.173 | 0.299 |

*Table 12. Path Analysis: Direct, Indirect, and Total Effects on Migrant Satisfaction*

| **No.** | **Hypothesis** | **Result** |
| --- | --- | --- |
| H1 | Tangibles have a significant positive effect on Migrant's Satisfaction | Accepted |
| H2 | Responsiveness has a significant positive effect on Migrant's Satisfaction | Accepted |
| H3 | Reliability has a significant positive effect on Migrant's Satisfaction | Accepted |
| H4 | Assurance has a significant positive effect on Migrant's Satisfaction | Accepted |
| H5 | Empathy has a significant positive effect on Migrant's Satisfaction | Accepted |
| H6 | Tangibles positively affect Migrant's Satisfaction through Quality of Dental Health Services | Accepted |
| H7 | Responsiveness positively affects Migrant's Satisfaction through Quality of Dental Health Services | Accepted |
| H8 | Reliability positively affects Migrant's Satisfaction through Quality of Dental Health Services | Accepted |
| H9 | Assurance positively affects Migrant's Satisfaction through Quality of Dental Health Services | Accepted |
| H10 | Empathy positively affects Migrant's Satisfaction through Quality of Dental Health Services | Accepted |
| H11 | Responsiveness, reliability, assurance, and empathy simultaneously impact migrant satisfaction | Accepted |

*Table 13. Hypothesis Test Result Summary*
